# Supplementary material for: Auxin represses stomatal development in dark-grown seedlings via Aux/IAA proteins
Source: Oxford University Press journal article supplement (doi:10.1242/dev.109181), 2014-07-26
Supplement: dev109181_supp.pdf [file dev109181_supp.pdf]

## Supplementary Materials and Methods

### Quantification of epidermal cell types

Epidermal cell types were quantified in bright field images of cleared cotyledons of 10-d-old seedlings or leaves of 21-d-old plants using ImageJ 1.43u software (Wayne Rasband, NIH, Bethesda, USA). Depending on cotyledon or leaf size, up to three areas in the abaxial epidermis were selected, avoiding the margin and the area close to the petiole, and cell types in these areas were counted. Area size was 250  $\mu\text{m}$  x 250  $\mu\text{m}$  in cotyledons of light-grown seedlings and 100  $\mu\text{m}$  x 100  $\mu\text{m}$  in cotyledons of dark-grown seedlings. Epidermal cells were classified as stomata (i.e. pairs of guard cells), stomatal precursors (i.e. meristemoids and GMCs) or other epidermal cells according to morphological differences described in Nadeau and Sack (2002). Percentage of stomata was calculated as  $\text{stomata} / (\text{stomata} + \text{stomatal precursors} + \text{other epidermal cells})$  and percentage of stomatal precursors was calculated as  $\text{stomatal precursors} / (\text{stomata} + \text{stomatal precursors} + \text{other epidermal cells})$ .

For quantification of total cell numbers, cells were quantified in confocal images of whole, PI-stained cotyledons of 2- or 10-d-old seedlings using ImageJ 1.43 software. For light-grown seedlings, cells in one half of each cotyledon were counted and the total cell numbers were extrapolated.

Eight to ten cotyledons or leaves of individual seedlings and plants, respectively, were analysed per genotype and condition. Percentages of stomata and stomatal precursors were calculated for each cotyledon or leaf individually before mean and s.e.m. were calculated from these data.

### Statistical analysis

Statistical analyses were performed in R (<http://www.r-project.org>). Data were checked for deviations from normality using the Shapiro-Wilk test. Variances of normally distributed data were then analysed using Levene's test for homogeneity of variance. Comparisons of two normally distributed samples with equal variances were carried out using a two-tailed *t*-test; in case of unequal variances a Welch-corrected *t*-test was applied. For multiple comparisons of normally distributed data, an ANOVA (or Welch-ANOVA for samples with unequal variances) was performed. If significant differences were detected by ANOVA, a post-hoc

analysis was carried out using Tukey's HSD test for samples with equal variances or Dunnett's modified Tukey-Kramer test for samples with unequal variances.

In rare cases when data showed strong deviations from a normal distribution, non-parametric tests were performed. For pairwise comparisons, a Wilcoxon rank sum test was used while for multiple comparisons, a Kruskal-Wallis one-way analysis of variance was carried out, which was followed by multiple pairwise Wilcoxon rank sum tests if significant differences were detected.

### Plasmid construction

To generate *promoter::axr3-1-YFP* constructs the Venus-YFP coding sequence was PCR-amplified from the pDEST-Venus-GW-Ter vector (R. Hänsch, unpublished) with primers introducing XhoI and SpeI restriction sites, the purified PCR product was digested with XhoI and SpeI and ligated into pJIC30 (Corbesier et al., 2007), thereby generating pJIC30-YFP. The *axr3-1* ORF was PCR-amplified from the pBS-axr3-1 vector (Ouellet et al., 2001) with primers introducing HindIII and XhoI restriction sites, the purified PCR product was digested with HindIII and XhoI and ligated into pJIC30-YFP, thereby generating pJIC30-axr3-1-YFP.

Promoter fragments 2421 bp upstream of the *AXR3* ORF, 2581 bp upstream of the *ICE1* ORF and 2574 bp upstream of the *SPCH* ORF were amplified from Col-0 genomic DNA and the purified PCR products were cloned into pDONR<sup>TM</sup>207 using GATEWAY<sup>®</sup> BP technology, thereby generating the promoter entry clones pDONR<sup>TM</sup>207-AXR3pro, pDONR<sup>TM</sup>207-ICE1pro and pDONR<sup>TM</sup>207-SPCHpro. Entry clones containing the *ML1* and *CAB3* promoters were described previously (An et al., 2004; Ranjan et al., 2011). *Promoter::axr3-1-YFP* constructs were generated by GATEWAY<sup>®</sup> LR reactions between these promoter entry clones and the pJIC30-axr3-1-YFP destination vector. Primers used for cloning are listed in Table S3.

### Supplementary References

An, H., Roussot, C., Suárez-López, P., Corbesier, L., Vincent, C., Piñeiro, M., Hepworth, S., Mouradov, A., Justin, S., Turnbull, C., et al. (2004). CONSTANS acts in the phloem to regulate a systemic signal that induces photoperiodic flowering of Arabidopsis. *Development* **131**, 3615–3626.

Corbesier, L., Vincent, C., Jang, S., Fornara, F., Fan, Q., Searle, I., Giakountis, A., Farrona, S., Gissot, L., Turnbull, C., et al. (2007). FT Protein Movement

Contributes to Long-Distance Signaling in Floral Induction of Arabidopsis. *Science* **316**, 1030–1033.

**Nadeau, J. A. and Sack, F. D.** (2002). Stomatal Development in Arabidopsis. *Arabidopsis Book* **1**, e0066.

**Ouellet, F., Overvoorde, P. J. and Theologis, A.** (2001). IAA17/AXR3: Biochemical Insight into an Auxin Mutant Phenotype. *Plant Cell* **13**, 829–841.

**Ranjan, A., Fiene, G., Fackendahl, P. and Hoecker, U.** (2011). The Arabidopsis repressor of light signaling SPA1 acts in the phloem to regulate seedling de-etiolation, leaf expansion and flowering time. *Development* **138**, 1851–1862.

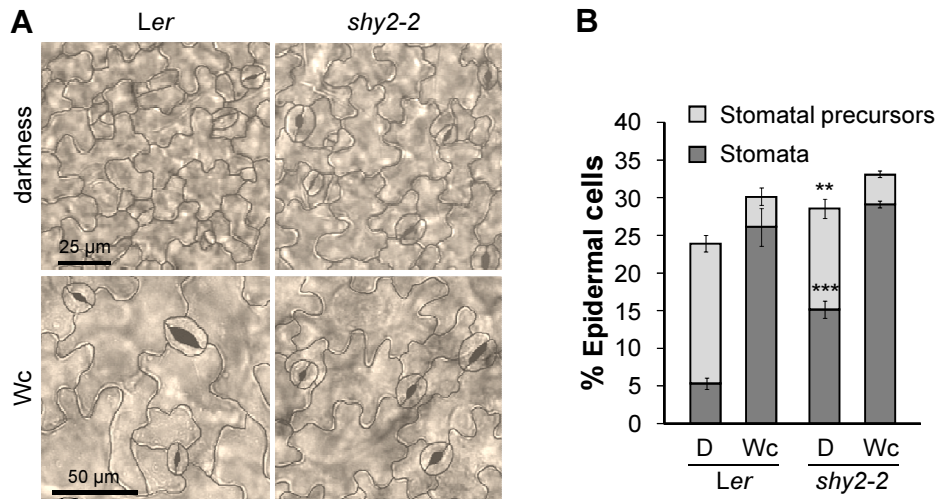

**Fig. S1. The *shy2-2* mutant shows increased stomata formation in darkness. (A)** Brightfield images of the cotyledon epidermis of dark- and Wc-grown seedlings of the indicated genotypes. Cell outlines were traced in dark grey. **(B)** Quantification of stomata and stomata precursors of the genotypes shown in A. Error bars represent the s.e.m. Asterisks indicate significant differences in the proportion of stomatal precursors or stomata, respectively, when compared to the *Ler* wild type (\*\* $p < 0.01$ , \*\*\*  $p < 0.001$ , \*  $p < 0.05$ ).

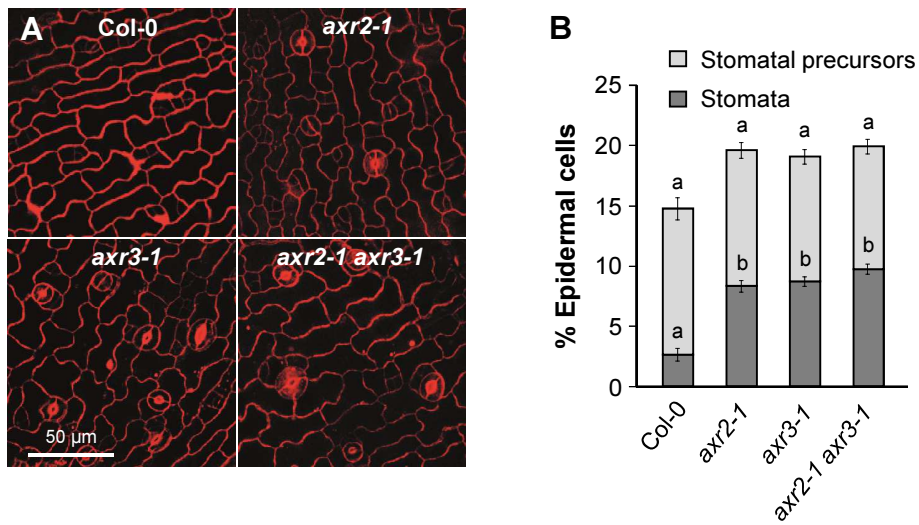

**Fig. S2. The *axr2-1 axr3-1* double mutant shows no increased stomata formation in comparison to the respective single mutants. (A)** Confocal images of the cotyledon epidermis of dark-grown seedlings of the indicated genotypes. Cell outlines were visualised by PI staining. **(B)** Quantification of stomata and stomatal precursors of the genotypes shown in A. Error bars represent the s.e.m. Letters indicate significance groups for each cell type; samples with the same letters are not significantly different ( $p < 0.05$ ).

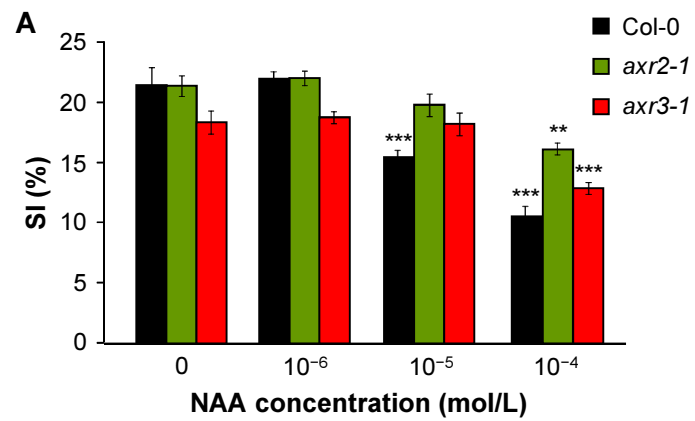

**Fig. S3. NAA treatment affects stomatal development.** SI of the cotyledon epidermis of Wc-grown Col-0, *axr2-1* and *axr3-1* seedlings treated with different concentrations of NAA. Error bars represent the s.e.m. Asterisks indicate significant differences to the wild type (\*\*\*)  $p < 0.001$ , \*\*  $p < 0.01$ , \*  $p < 0.05$ ).

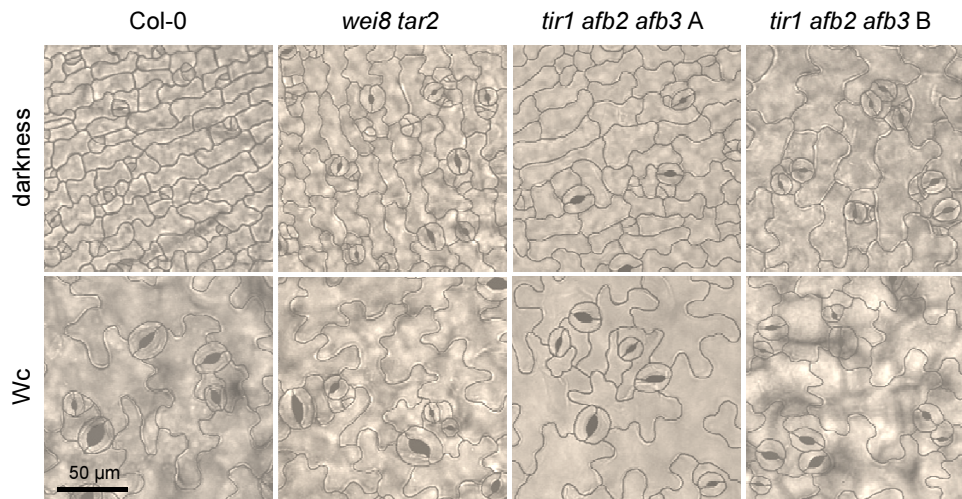

**Fig. S4. Mutants deficient in auxin biosynthesis or auxin perception are defective in stomatal development.** Brightfield images of the cotyledon epidermis of dark- and Wc-grown seedlings of the indicated genotypes. *tir1 afb2 afb3* seedlings were grouped into classes A and B, which refer to mild and strong phenotypes, respectively. Cell outlines were traced in dark grey.

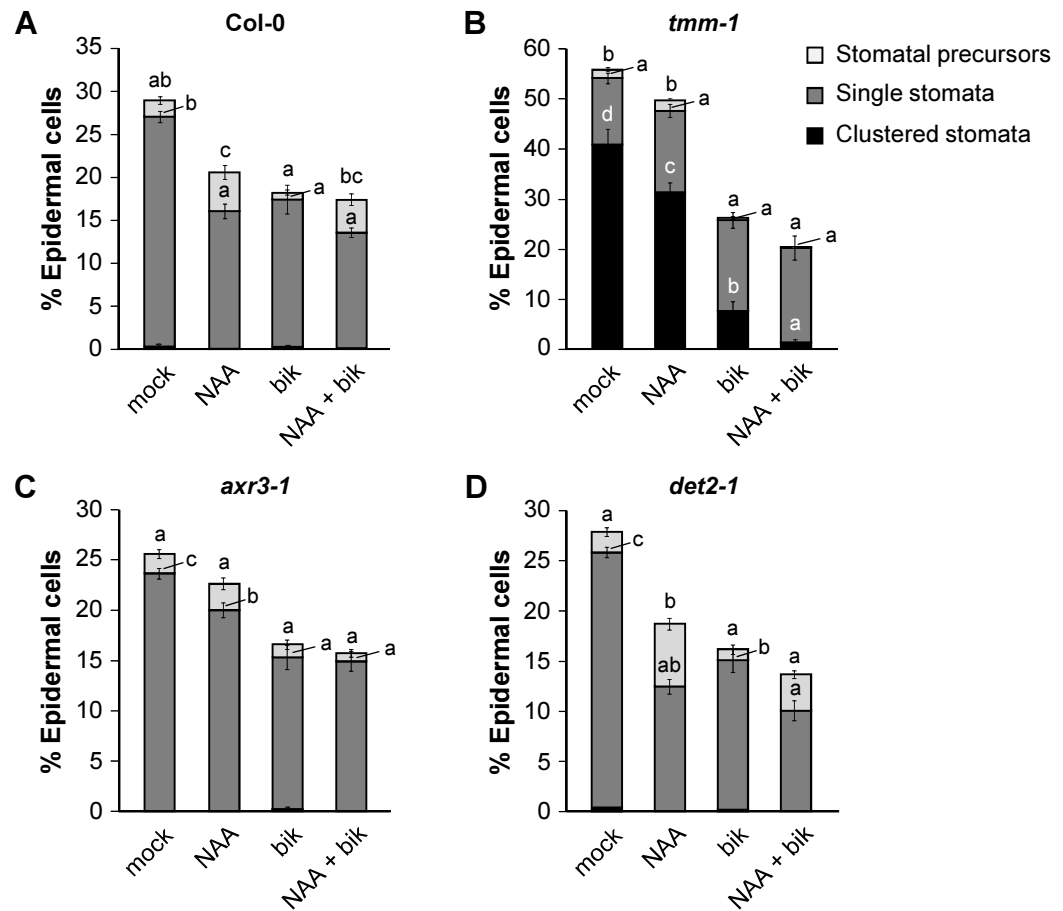

**Fig. S5. NAA and bikinin have additive effects on stomata formation.** Quantification of stomata and stomatal precursors in the abaxial cotyledon epidermis of Wc-grown Col-0 (A), *tmm-1* (B), *axr3-1* (C) and *det2-1* (D) seedlings treated with 10  $\mu$ M NAA, 30  $\mu$ M bikinin, a combination of both or mock-treated. Error bars represent the s.e.m. Letters indicate significance groups for each cell type; samples with the same letters are not significantly different ( $p < 0.05$ ).



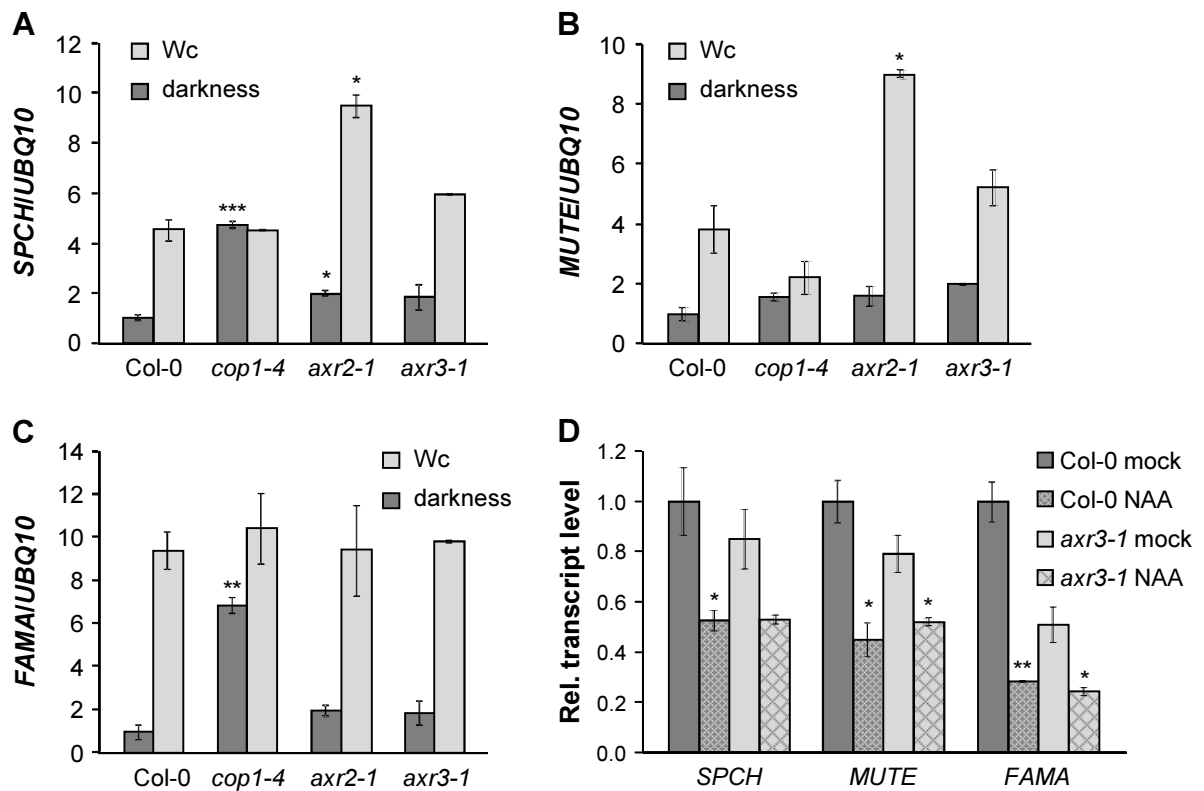

**Fig. S6. Analysis of *SPCH*, *MUTE* and *FAMA* transcripts.** (A-C) Transcript levels of *SPCH* (A), *MUTE* (B) and *FAMA* (C) in 5-d-old dark- or Wc-grown seedlings of the indicated genotypes. (D) *SPCH*, *MUTE* and *FAMA* transcript levels in 5-d-old Wc-grown Col-0 and *axr3-1* seedlings treated with 10  $\mu$ M NAA or mock-treated. Transcript levels were normalised to *UBQ10* and are shown relative to the levels of dark-grown Col-0 seedlings (A-C) or the mock-treated Col-0 control (D). Error bars represent the s.e.m. Asterisks indicate significant differences to dark-grown wild type (A-C) or the mock-treated control (D) (\*\* $p < 0.01$ , \*\* $p < 0.01$ , \* $p < 0.05$ ).

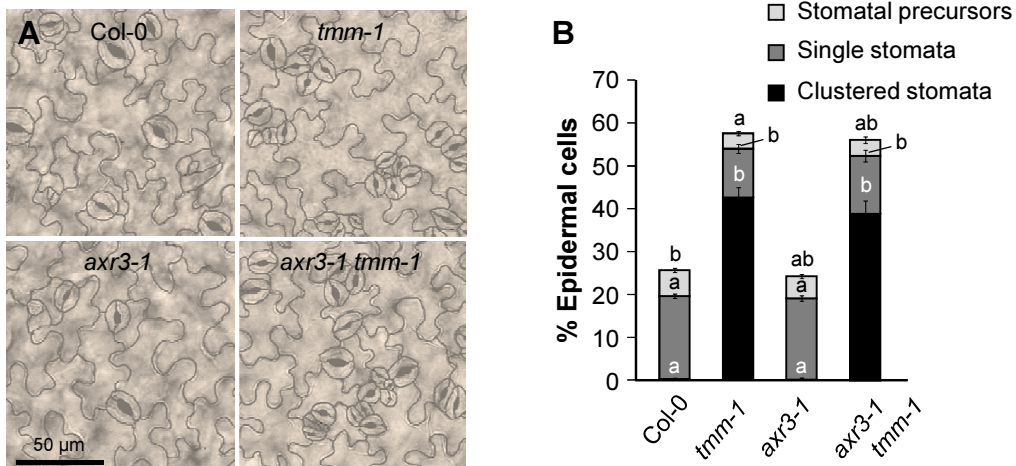

**Fig. S7: The *axr3-1* mutation has no effect on the phenotype of Wc-grown *tmm-1* mutant seedlings.**

(A) Brightfield images of the cotyledon epidermis of Wc-grown seedlings of the indicated genotypes. Cell outlines were traced in dark grey. (B) Quantification of stomata and stomatal precursors of the genotypes shown in A. Error bars represent the s.e.m. Letters indicate significance groups for each cell type; samples with the same letters are not significantly different ( $p < 0.05$ ).

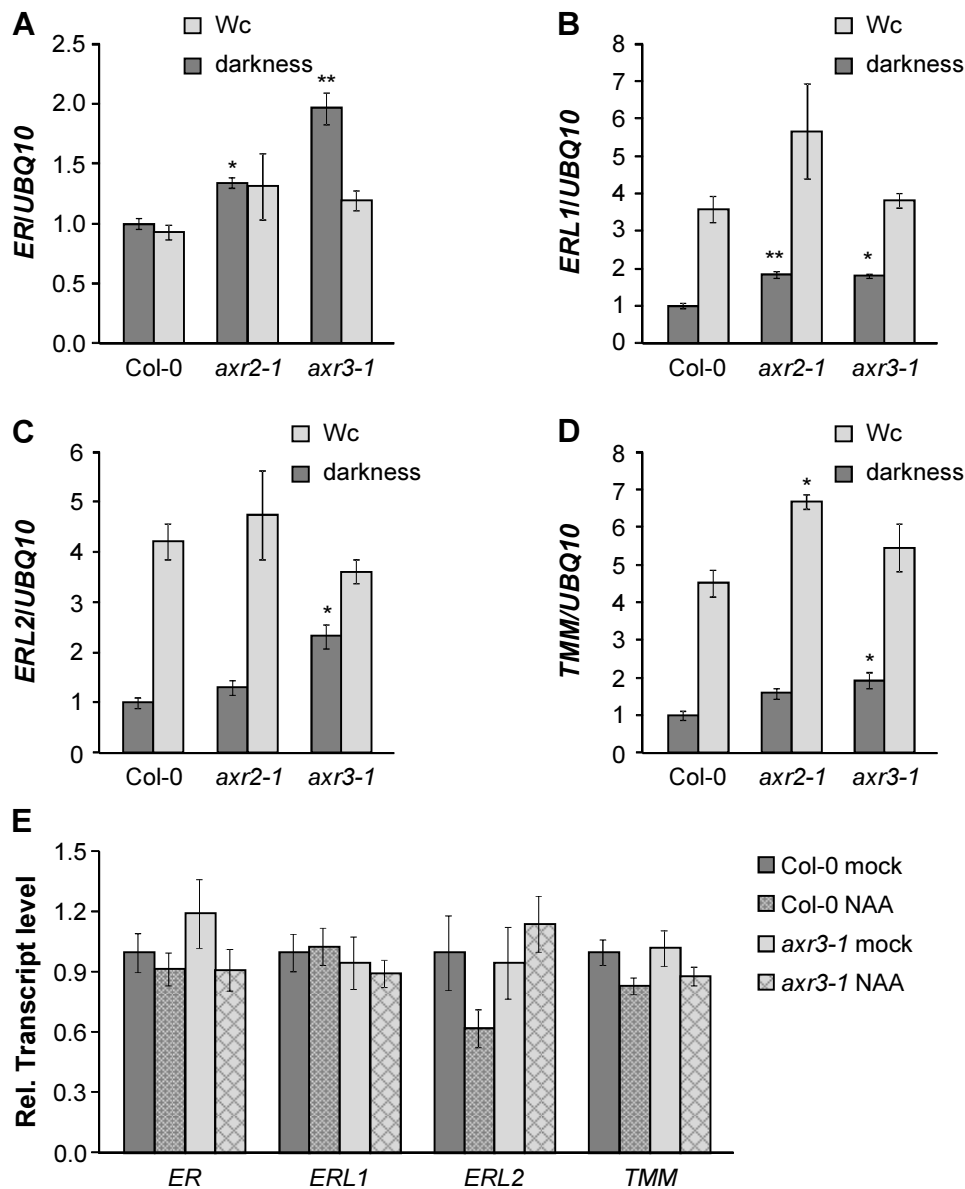

**Fig. S8. Analysis of *ER(L)* and *TMM* transcripts.** (A-D) Transcript levels of *ER* (A), *ERL1* (B), *ERL2* (C) and *TMM* (D) in 5-d-old dark- or Wc-grown seedlings of the indicated genotypes. (E) *ER(L)* and *TMM* transcript levels in 5-d-old Wc-grown Col-0 and *axr3-1* seedlings treated with 10  $\mu$ M NAA or mock-treated. Transcript levels were normalised to *UBQ10* and are shown relative to the levels of dark-grown Col-0 seedlings (A-D) or the mock-treated Col-0 control (E). Error bars represent the s.e.m. Asterisks indicate significant differences to dark-grown wild type (A-D) or the mock-treated control (E) (\*\* $p < 0.01$ , \* $p < 0.05$ ).

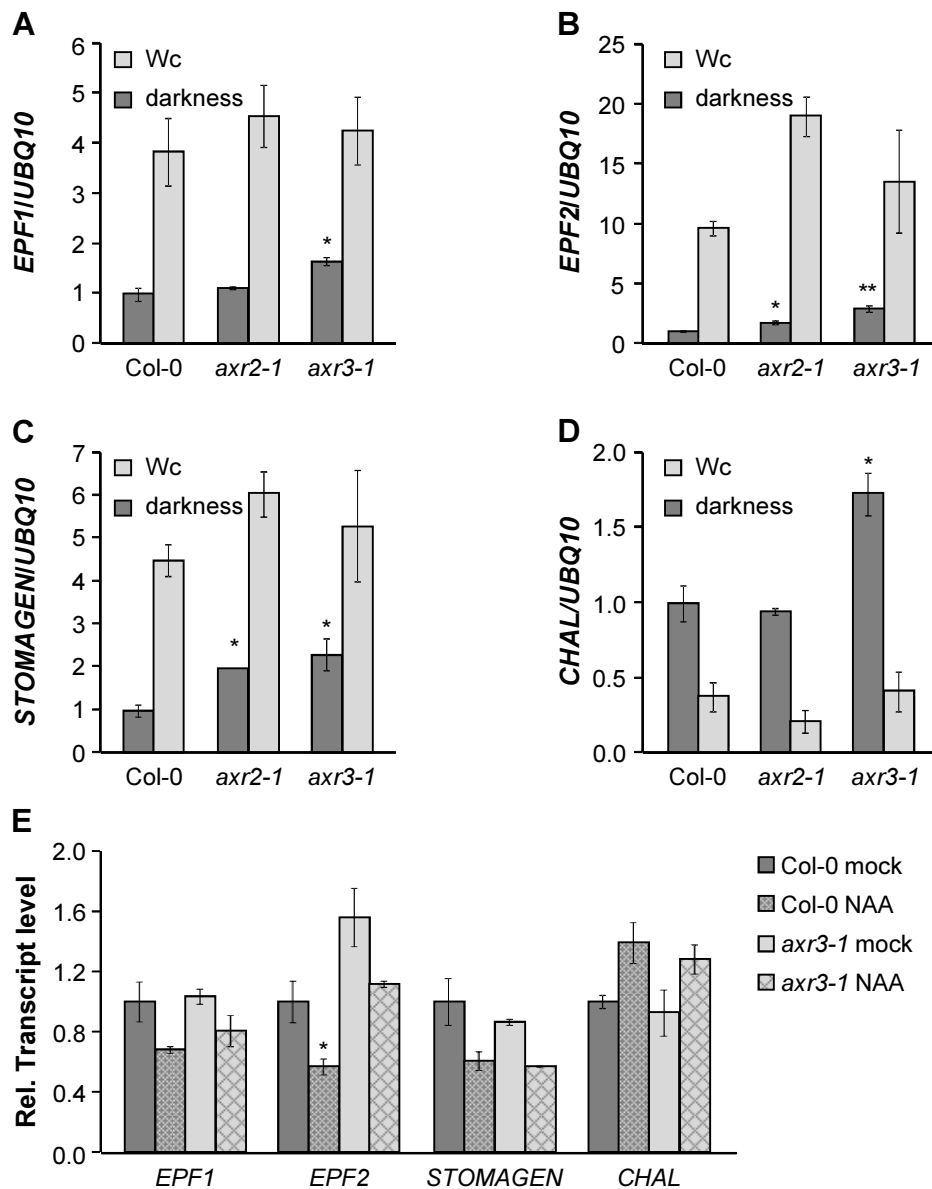

**Fig. S9. Analysis of EPFL transcripts.** (A-D) Transcript levels of *EPF1* (A), *EPF2* (B), *STOMAGEN* (C) and *CHAL* (D) in 5-d-old dark- or Wc-grown seedlings of the indicated genotypes. (E) *EPFL* transcript levels in 5-d-old Wc-grown Col-0 and *axr3-1* seedlings treated with 10  $\mu$ M NAA or mock-treated. Transcript levels were normalised to *UBQ10* and are shown relative to the levels of dark-grown Col-0 seedlings (A-D) or the mock-treated Col-0 control (E). Error bars represent the s.e.m. Asterisks indicate significant differences to dark-grown wild type (A-D) or the mock-treated control (E) (\*\* $p < 0.001$ , \*\*  $p < 0.01$ , \*  $p < 0.05$ ).

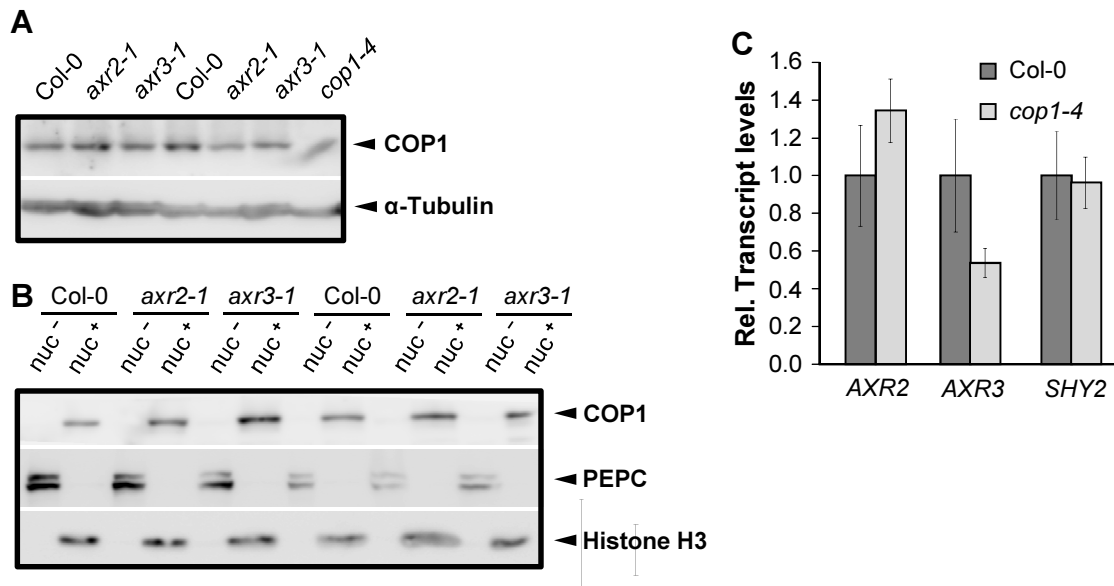

**Fig. S10. Aux/IAA proteins and COP1 seem to act independently in light-dependent stomata development.** (A, B) Immunodetection of COP1 protein in total protein extracts (A), nuclei-depleted ( $nuc^-$ ) and nuclei-enriched ( $nuc^+$ ) protein fractions (B) of 5-d-old dark-grown Col-0, *axr2-1* and *axr3-1* seedlings. Tubulin is shown as loading control, PEPC is shown as cytosolic marker and histone H3 is shown as nuclear marker. The nuclei-enriched fractions were 15 x enriched compared to the nuclei-depleted fractions. Two independent biological replicates are shown. (C) Transcript levels of *AXR2*, *AXR3* and *SHY2* in 5-d-old dark-grown Col-0 and *cop1-4* seedlings. Transcript levels were normalised to *UBQ10* and are shown to relative to the levels of dark-grown Col-0 seedlings. Error bars represent the s.e.m.

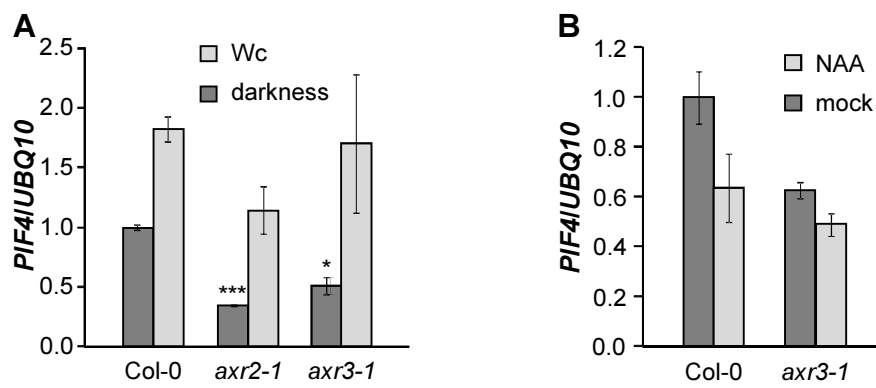

**Fig. S11. Analysis of *PIF4* transcript.** (A) Transcript levels of *PIF4* in 5-d-old dark- or Wc-grown seedlings of the indicated genotypes. (B) *PIF4* transcript levels in 5-d-old Wc-grown Col-0 and *axr3-1* seedlings treated with 10  $\mu$ M NAA or mock-treated. Transcript levels were normalised to *UBQ10* and are shown relative to the levels of dark-grown Col-0 seedlings (A) or the mock-treated Col-0 control (B). Error bars represent the s.e.m. Asterisks indicate significant differences to dark-grown wild type (A) or the mock-treated control (B) (\*\*\*)  $p < 0.001$ , \*\*  $p < 0.01$ , \*  $p < 0.05$ ).

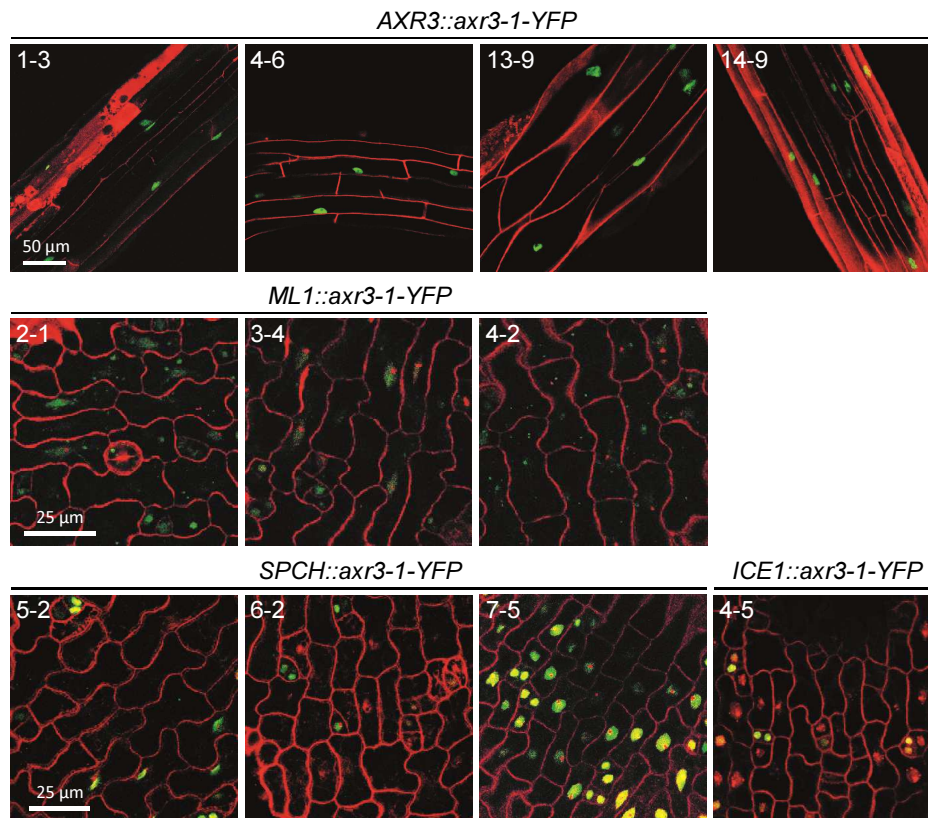

**Fig. S12. Accumulation of *axr3-1*-YFP protein in dark-grown seedlings of additional *promoter::axr3-1-YFP* lines.** Confocal images of the hypocotyl of Col-0 seedlings expressing *axr3-1*-YFP from the *AXR3* promoter (upper panel) and of the cotyledon epidermis of Col-0 seedlings expressing *axr3-1*-YFP from the *ML1* (middle panel), *SPCH* and *ICE1* (lower panel) promoters. Cell outlines were visualised by PI staining.

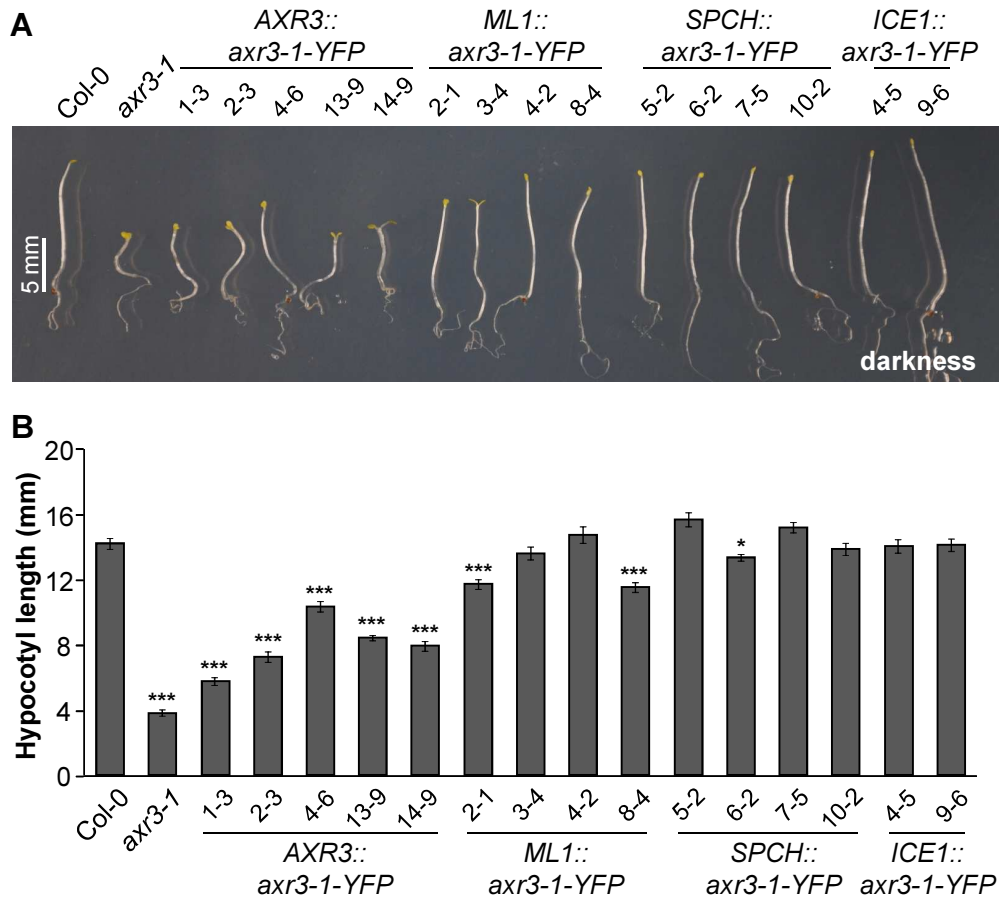

**Fig. S13. Plants expressing *axr3-1-YFP* in the epidermis partially mimic the phenotype of dark-grown *axr3-1* seedlings. (A) Visual phenotype of 10-d-old dark-grown seedlings of the indicated promoter::*axr3-1-YFP* lines. Numbers denote independent transgenic lines. Dark-grown Col-0 and *axr3-1* seedlings are shown as controls. (B) Quantification of hypocotyl length of the lines shown in A. Error bars represent the s.e.m. Asterisks indicate significant differences in hypocotyl length compared to the wild type (\*\*\*)  $p < 0.001$ , \*\*  $p < 0.01$ , \*  $p < 0.05$ ).**



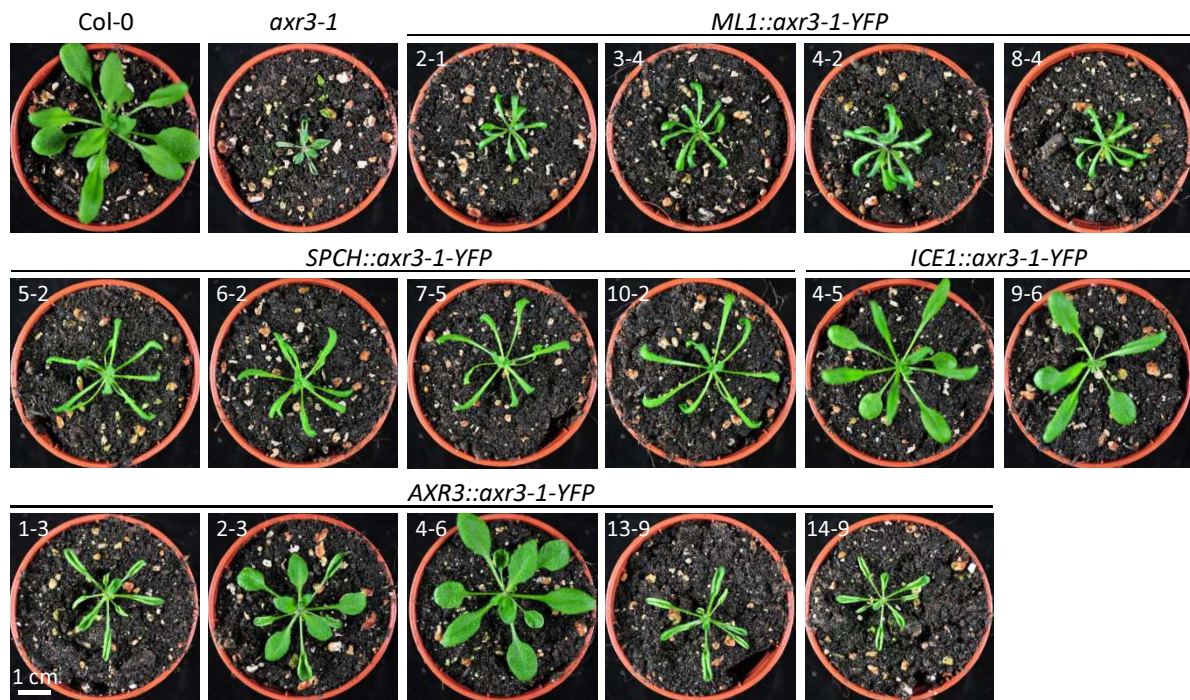

**Fig. S14. The *axr3-1* adult plant phenotype is not completely mimicked by any *promoter::axr3-1-YFP* line.** Visual phenotype of 24-d-old adult plants of the indicated *promoter::axr3-1-YFP* lines grown in long day conditions. Col-0 and *axr3-1* plants are shown as controls.

## Supplementary Tables

**Table S1. Primers and restriction enzymes used for genotyping.**

| <b>Mutant</b> | <b>Primer name</b> | <b>Primer sequence</b>                 | <b>Restr. enzyme</b> |
|---------------|--------------------|----------------------------------------|----------------------|
| <i>axr2-1</i> | AXR2-geno_F2       | CAATACATACATGCGTACAAGC                 | MslI                 |
|               | AXR2-geno_R2       | ATGACTCTAACTCGGTAAGGTTT                |                      |
| <i>axr3-1</i> | AXR3-geno_F1       | TTTTCCACTCTTCTCTACTGCTC                | BshTI                |
|               | AXR3-geno_R1       | CTCCGTCCATTGATACCTTC                   |                      |
| <i>cop1-4</i> | COP1-geno_F1       | GATGCGCTGAGTGGGCCA                     | HpyF10VI             |
|               | COP1-geno_R1       | TGCCATTGTCCTTTTACCATTTCAGC             |                      |
| <i>er-105</i> | ERg2248            | AAGAAGTCATCTAAAGATGTGA                 | –                    |
|               | Erg3016rc          | AGAATTTTCAGGTTTGGAACTCTGT              |                      |
|               | er-105             | AGCTGACTATAACCCGATACTGA                |                      |
| <i>erl1-2</i> | ERL1-geno_F2       | AGGGAAAAATACCAGTTGAGC                  | –                    |
|               | ERL1-geno_R2       | CGGAGAGATTGTTGAAGGAG                   |                      |
|               | JL-202             | CATTTTATAATAACGCTGCGGACA<br>TCTAC      |                      |
| <i>erl2-1</i> | ERL2-geno_F3       | GAACTATCCCAGAGAGCATT                   | –                    |
|               | ERL2-geno_R3       | TGATTCAAGGCAGCACAG                     |                      |
|               | JL-202             | CATTTTATAATAACGCTGCGGACA<br>TCTAC      |                      |
| <i>fama-1</i> | FAMA-geno_F1       | TGGTCTTGCTCGTTCTAGCTC                  | –                    |
|               | FAMA-geno_R1       | CTATCTTGCATGTCTTGCGTC                  |                      |
|               | SALK-LBb1.3        | ATTTTGCCGATTTTCGGAAC                   |                      |
| <i>mute-1</i> | mute-dCAPS_F1      | TTCGTTCTTTGACTCCTTGTTTCT<br>ACCTCAAAG  | BslI                 |
|               | mute-dCAPS_R1      | CTTCGAGAAAATAATTAGGATTGT<br>GAATTGAG   |                      |
| <i>spch-3</i> | SPCH-geno_F1       | GAAAAACCTAGATCCTCCCC                   | –                    |
|               | SPCH-geno_R3       | AACCTGAAGAATCTCAAGAGCC                 |                      |
|               | SAIL-LB1           | GCCTTTTCAGAAATGGATAAATAG<br>CCTTGCTTCC |                      |
| <i>tmm-1</i>  | tmm-1-dCAPS_F1     | AACGCGTTCAAAGGGCTCAAGAACGT             | AclI                 |
|               | tmm-1-dCAPS_R2     | AGACTGTTATCGTTGAGCC                    |                      |

**Table S2. Primers used for qPCR.**

| <b>Gene</b>     | <b>Primer name</b> | <b>Primer sequence</b>       |
|-----------------|--------------------|------------------------------|
| <i>AXR2</i>     | AXR2-RT_F2         | AGAGTCCTGCCAAATCGG           |
|                 | AXR2-RT_R2         | TGAGATCAACGGTTTCGG           |
| <i>AXR3</i>     | AXR3-RT_F1         | CTCTTTTACCATGGGCAAACATGGA    |
|                 | AXR3-RT_R1         | AGGGAACATAGTCCCAGCTATTCA     |
| <i>CHAL</i>     | CHAL-RT_F2         | CATTACAACCATCAGAAAACACGAG    |
|                 | CHAL-RT_R2         | TGACACAGAGGACGAAGAAGAGTAG    |
| <i>EPF1</i>     | EPF1-RT_F2         | GGCATTTACCAACATCCTCC         |
|                 | EPF1-RT_R2         | CCTCCTCCTCTGACGCTTC          |
| <i>EPF2</i>     | EPF2-RT_F2         | CACTAAAAACACGGTCAATGG        |
|                 | EPF2-RT_R2         | TGCTTATTTCTTCTTGTGGTG        |
| <i>ER</i>       | ER-RT_F2           | GACTCTTGATTGGGACACACG        |
|                 | ER-RT_R2           | AGAATGTTGGACGACTTCACG        |
| <i>ERL1</i>     | ERL1-RT_F1         | GCAGCAAGAGAATGAAGTTAGG       |
|                 | ERL1-RT_R1         | AACCATCCTTTCTTCCAATC         |
| <i>ERL2</i>     | ERL2-RT_F2         | AAGTGATTTAGGGCTAGTATGAGGG    |
|                 | ERL2-RT_R2         | GAACTCGTGAAGATGTCCATTG       |
| <i>FAMA</i>     | FAMA-RT_F2         | CTGCTTTGGAGGATCTTCATCTCT     |
|                 | FAMA-RT_R2         | CTTCTGCCGTAAACCTCGTTTC       |
| <i>MUTE</i>     | MUTE-RT_F2         | GACGATCACTTCATCAGACACAAAG    |
|                 | MUTE-RT_R2         | CCTCAATATTAGTAGCATGGAGGAGACT |
| <i>PIF4</i>     | PIF4-RT_F1         | GCTTCGGCTCCGATGAT            |
|                 | PIF4-RT_R1         | CGCGGCCTGCATGTGTG            |
| <i>SHY2</i>     | SHY2-RT_F1         | CTTAAAGCTTTAGAAGTGATGTTCAA   |
|                 | SHY2-RT_R1         | CACGTACATATGAACATCTCCCA      |
| <i>SPCH</i>     | SPCH-RT_F2         | TTCTGCACTTAGTTGGCACTCAAT     |
|                 | SPCH-RT_R2         | GCTGCTCTTGAAGATTTGGCTCT      |
| <i>STOMAGEN</i> | STOM-RT_F2         | AATACGGTCTCCCTTCTCCC         |
|                 | STOM-RT_R2         | CTGGAACTTGCTCTGCTCTG         |
| <i>TMM</i>      | TMM-RT_F3          | AACAGTCTTCGGGTCCTTCAC        |
|                 | TMM-RT_R3          | GCTCGCTTAGATGCTTCACG         |
| <i>UBQ10</i>    | UBQ10-RT_F         | CACACTCCACTTGGTCTTGCCT       |
|                 | UBQ10-RT_R         | TGGTCTTTCCGGTGAGAGTCTTCA     |

**Table S3. Primers used for cloning.**

| <b>Primer name</b> | <b>Primer sequence</b>                                        |
|--------------------|---------------------------------------------------------------|
| AXR3pro-attB-F     | GGGGACAAGTTTGTACAAAAAAGCAGGCTTGTGGTAGAATGTTGAGAG<br>TTGTGGC   |
| AXR3pro-attB-R     | GGGGACCACTTTGTACAAGAAAGCTGGGTATTAAACCTTTCTTCTTCT<br>TTGGTGTTT |
| AXR3-XhoI-R        | CATGCTCGAGAGCTCTGCTCTTGCACTTCTCC                              |
| HindIII-AXR3-F     | CTTGAAGCTTATGATGGGCAGTGTCTGAGCTG                              |
| ICE1pro-attB-F     | GGGGACAAGTTTGTACAAAAAAGCAGGCTACCGGACCACCGTCAATAA<br>CATCG     |
| ICE1pro-attB-R     | GGGGACCACTTTGTACAAGAAAGCTGGGTTCGCCAAAGTTGACACCTTT<br>ACCC     |
| SPCHpro-attB-F     | GGGGACAAGTTTGTACAAAAAAGCAGGCTCAAGATCATCACTGCGATA<br>AGGAG     |
| SPCHpro-attB-R     | GGGGACCACTTTGTACAAGAAAGCTGGGTTCGTGATTAGAGATATATCC<br>TTCTC    |
| XhoI-YFP-F         | GCATCTCGAGATGGTGAGCAAGGGCGAGGAG                               |
| YFP-SpeI-R         | TCACACTAGTCTACTTGTACAGCTCGTCCATGC                             |
